# Supplementary material
Source: publisher figshare collection journal article supplement (https://rs.figshare.com/ndownloader/files/25764023)
Supplement: Supplementary file 1 [file 25764023]

## Sheet: Table S1
Table S1. Results of mixed effects regression logistic analyses that predict whether a male chimpanzee fathered a particular offspring. Coefficients of main effect predictors and their standard errors are shown. The model included male and the offspring’s mother identities as random intercepts and assumed a binomial distribution (N = 4,744 fathering opportunities, 76 males, 58 mothers, 105 offspr…
a) Male age
	Estimate	Std. Error
intercept	-4.2	0.2
male age	0.24	0.3
first-time mother	-0.03	0.21
male age x first-time mother	-1.03	0.49
b) Male rank
	Estimate	Std. Error
intercept	-4.2	0.18
male rank	0.93	0.25
first-time mother	0.16	0.21
male rank x first-time mother	-1.28	0.42

## Sheet: Table S2
Table S2. Results of a model selection analysis where outcome variable was the number of times a specific pair of male and female chimpanzees mated. Models are ranked by their AICc values.
models	intercept	observation offset	oestrus time	female is nulliparous	male age	female is nulliparous x male age	male aggression	male aggression x male age	association	association x male age	grooming time	grooming time x male age	grooming time x male aggression	AICc	delta	weight
groom_agg_parity	-2.98693	+	1.15205	0.327102	0.461831	-0.980604	1.65478	-0.515691	0.294945	0.443016	0.431315	-0.309605	NA	1323.33	0	0.571358
groom_agg_parity_int	-2.9913	+	1.14934	0.32332	0.460856	-1.00224	1.66448	-0.504109	0.246115	0.361815	0.412152	-0.323559	0.160462	1324.71	1.37999	0.286581
groom_parity	-3.00752	+	1.19423	0.289187	0.488276	-1.06096	1.78455	-0.390995	NA	NA	0.451067	-0.278379	NA	1326.29	2.96482	0.12975
agg_parity	-2.98258	+	1.16645	0.382127	0.505977	-0.932468	1.76178	-0.405224	0.319906	0.470093	NA	NA	NA	1332.93	9.59829	0.00470615
groom_agg	-2.96176	+	1.28558	NA	0.425286	NA	1.67212	-0.70866	0.334336	0.522533	0.440047	-0.385648	NA	1332.95	9.62633	0.00464064
groom_agg_int	-2.96373	+	1.28342	NA	0.425006	NA	1.67686	-0.706215	0.306611	0.475877	0.428276	-0.392572	0.0969044	1334.76	11.437	0.00187668
assoc_parity	-3.00112	+	1.21176	0.342619	0.538416	-1.01451	1.91284	-0.253221	NA	NA	NA	NA	NA	1336.97	13.6424	0.000623019
groom	-2.9741	+	1.30859	NA	0.453013	NA	1.8127	-0.573177	NA	NA	0.463789	-0.348578	NA	1337.81	14.4781	0.000410229
agg	-2.96758	+	1.32547	NA	0.459417	NA	1.77727	-0.614846	0.354295	0.541014	NA	NA	NA	1341.96	18.6363	5.12968e-05
assoc	-2.97809	+	1.35096	NA	0.493221	NA	1.93999	-0.45052	NA	NA	NA	NA	NA	1347.74	24.4169	2.85002e-06
parity	-2.35427	+	1.44017	0.623324	0.383882	-1.21445	NA	NA	NA	NA	NA	NA	NA	1531.26	207.931	4.0293e-46
oest	-2.26648	NA	1.86623	NA	NA	NA	NA	NA	NA	NA	NA	NA	NA	1547.28	223.95	1.33926e-49
obsoest	-2.33721	+	1.71762	NA	NA	NA	NA	NA	NA	NA	NA	NA	NA	1550.49	227.163	2.6855e-50
obs	-2.36101	+	NA	NA	NA	NA	NA	NA	NA	NA	NA	NA	NA	1583.19	259.859	2.13431e-57
intercept	-2.35012	NA	NA	NA	NA	NA	NA	NA	NA	NA	NA	NA	NA	1590.51	267.184	5.47942e-59
							0.375311

## Sheet: Table S3
Table S3. Coefficients and standard errors for all main effect predictors included in the GLMM models that a) had the lowest AICc value and comprised 57% of the model weight and b) had the second-lowest AICc value and comprised 29% of the model weight, where the outcome variable is the number of times males and females mated. Both models assumed a negative binomial distribution and included obser…
a)
	Estimate	Std. Error	Incidence Rate Ratio
intercept	-2.98693	0.209266
oestrus time	1.15205	0.345049	3.16467
grooming time	0.431315	0.129992	1.53928
male age	0.461831	0.237377	1.58698
association	1.65478	0.165177	5.23191
male aggression	0.294945	0.122069	1.34305
female is nulliparous	0.327102	0.336786	1.38694
grooming time x male age	-0.309605	0.239012	0.733737
association x male age	-0.515691	0.276143	0.597088
aggression x male age	0.443016	0.219317	1.5574
female is nulliparous x male age	-0.980604	0.279666	0.375085
b)
	Estimate	Std. Error	Incidence Rate Ratio
intercept	-2.9913	0.209829
oestrus time	1.14934	0.346192	3.1561
grooming time	0.412152	0.128222	1.51006
male age	0.460856	0.237609	1.58543
association	1.66448	0.165615	5.28292
male aggression	0.246115	0.136428	1.27905
female is nulliparous	0.32332	0.337956	1.38171
grooming time x male age	-0.323559	0.239568	0.72357
association x male age	-0.504109	0.276251	0.604043
aggression x male age	0.361815	0.24098	1.43593
female is nulliparous x male age	-1.00224	0.280758	0.367055
grooming time x male aggression	0.160462	0.198086	1.17405

## Sheet: Table S4
Table S4. Model averaged coefficients from mating success model comparison (Table S2). Coefficients are averaged from the subset of models in which their parameter appears.
	Coefficient	Incidence Rate Ratio
intercept	-2.99
oestrus time	1.16	3.18993
grooming time	0.43	1.53726
male age	0.46	1.58407
association	1.68	5.36556
male aggression	0.28	1.32313
female is nulliparous	0.32	1.37713
grooming time x male age	-0.31	0.733447
association x male age	-0.5	0.606531
male aggression x male age	0.42	1.52196
female is nulliparous x male age	-1	0.367879
grooming time x male aggression	0.16	1.17351

## Sheet: Article Info
Article Name	The development of affiliative and coercive reproductive tactics in male chimpanzees
Authors	Rachna B. Reddy, Kevin E. Langergraber, Aaron A. Sandel, Linda Vigilant, John C. Mitani
Journal	Proceedings of the Royal Society B: Biological Sciences
DOI	10.1098/rspb.2020.2679
